# Supplementary material
Source: Springer Nature journal article supplement (https://www.springermedizin.de/resource/supplementary/12895_2010_125_MOESM2_ESM.pdf/9514164)

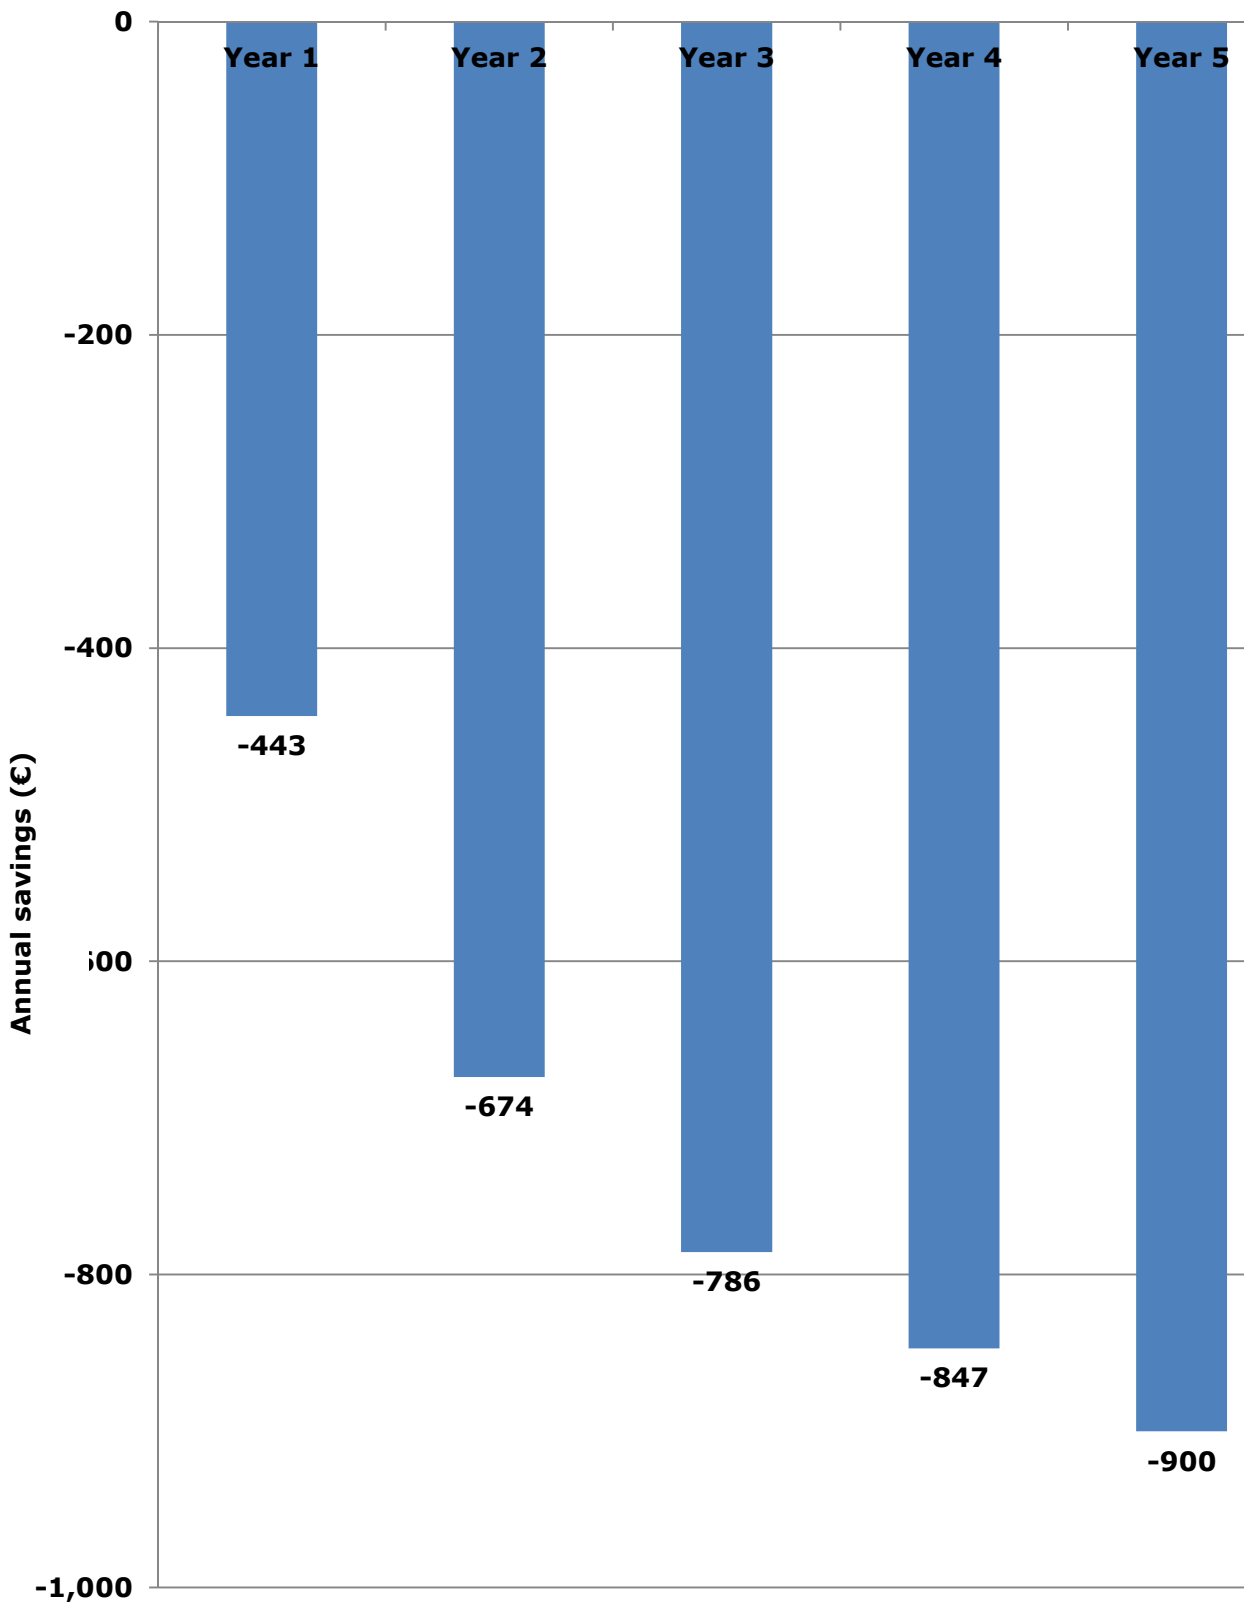

Supplement: MOESM2 [file 9514164]
